# Supplementary material for: Different Requirements of CBFB and RUNX2 in Skeletal Development among Calvaria, Limbs, Vertebrae and Ribs
Source: MDPI journal article supplement (doi:10.3390/ijms232113299), 2022-10-31
Supplement: s1 [file s1]

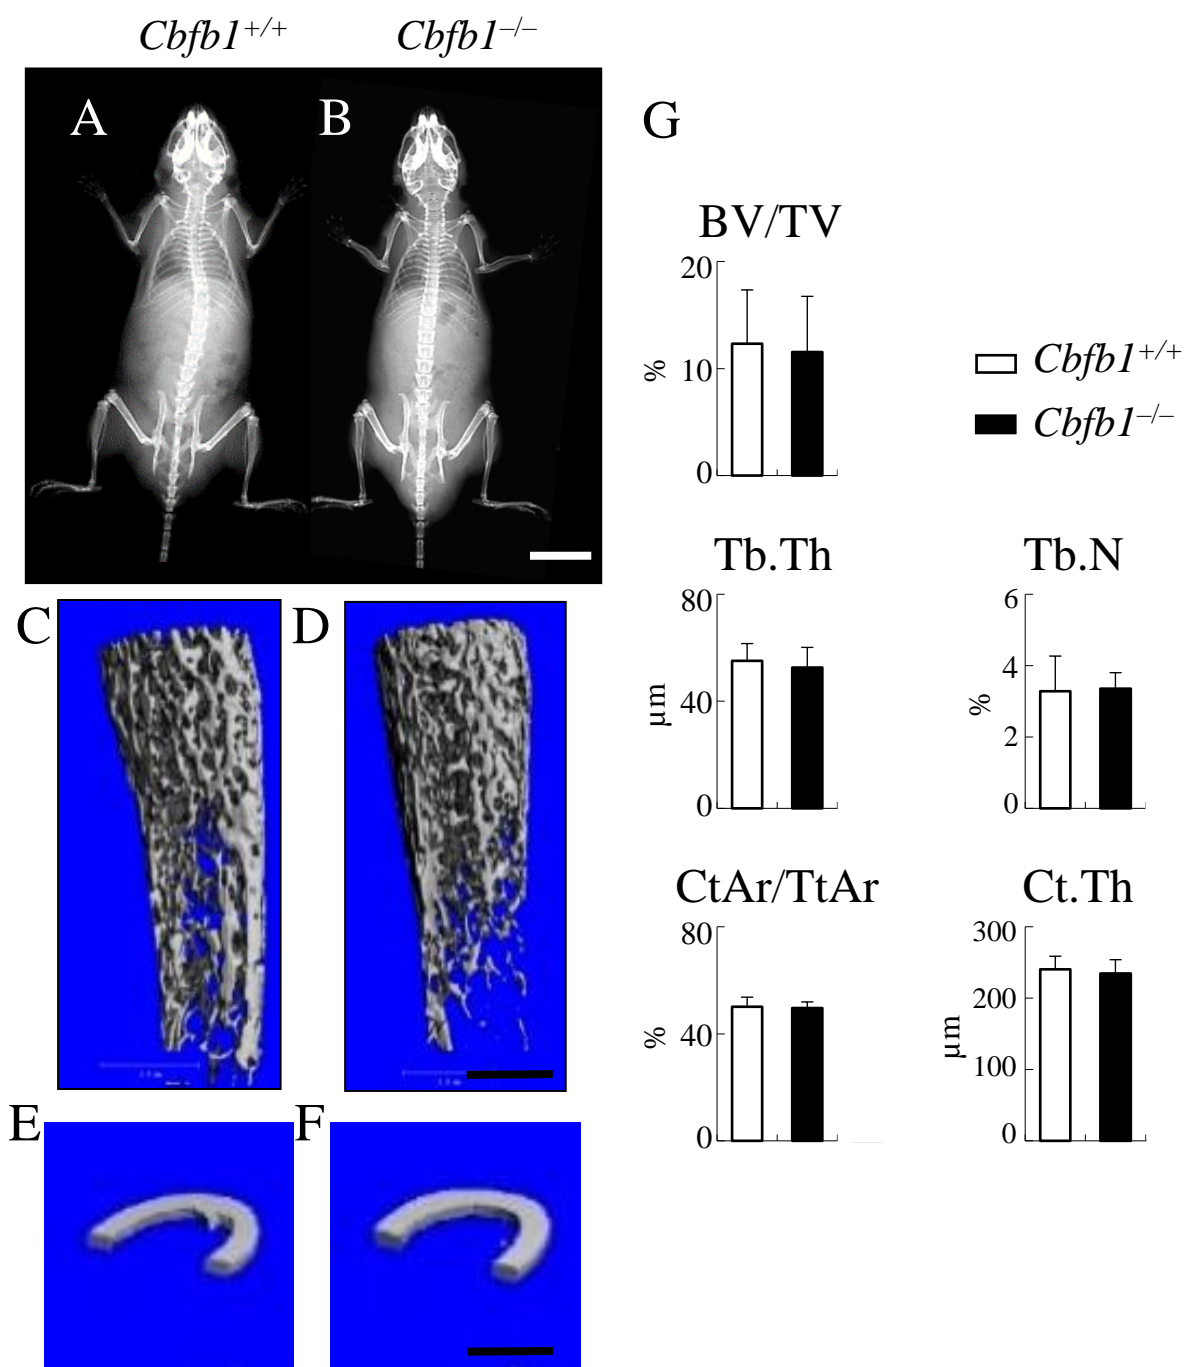

### Supplementary Figure S1.

Micro-CT analyses of femurs in  $Cbfb1^{+/+}$  and  $Cbfb1^{-/-}$  mice at 10 weeks of age. (A, B) X-ray analysis at 10 weeks of age. (C–F) Three-dimensional trabecular bone architecture of distal femoral metaphysis (C, D) and cortical bone at mid-diaphysis (E, F) in femurs. Scale bars: 1cm (A, B) and 1mm (C–F). (G) Quantification of the trabecular bone volume (bone volume/tissue volume, BV/TV), trabecular thickness (Tb.Th), trabecular number (Tb.N), the cortical area (CtAr/TtAr), and cortical thickness (Ct.Th). Seven  $Cbfb1^{+/+}$  and  $Cbfb1^{-/-}$  mice were analyzed.

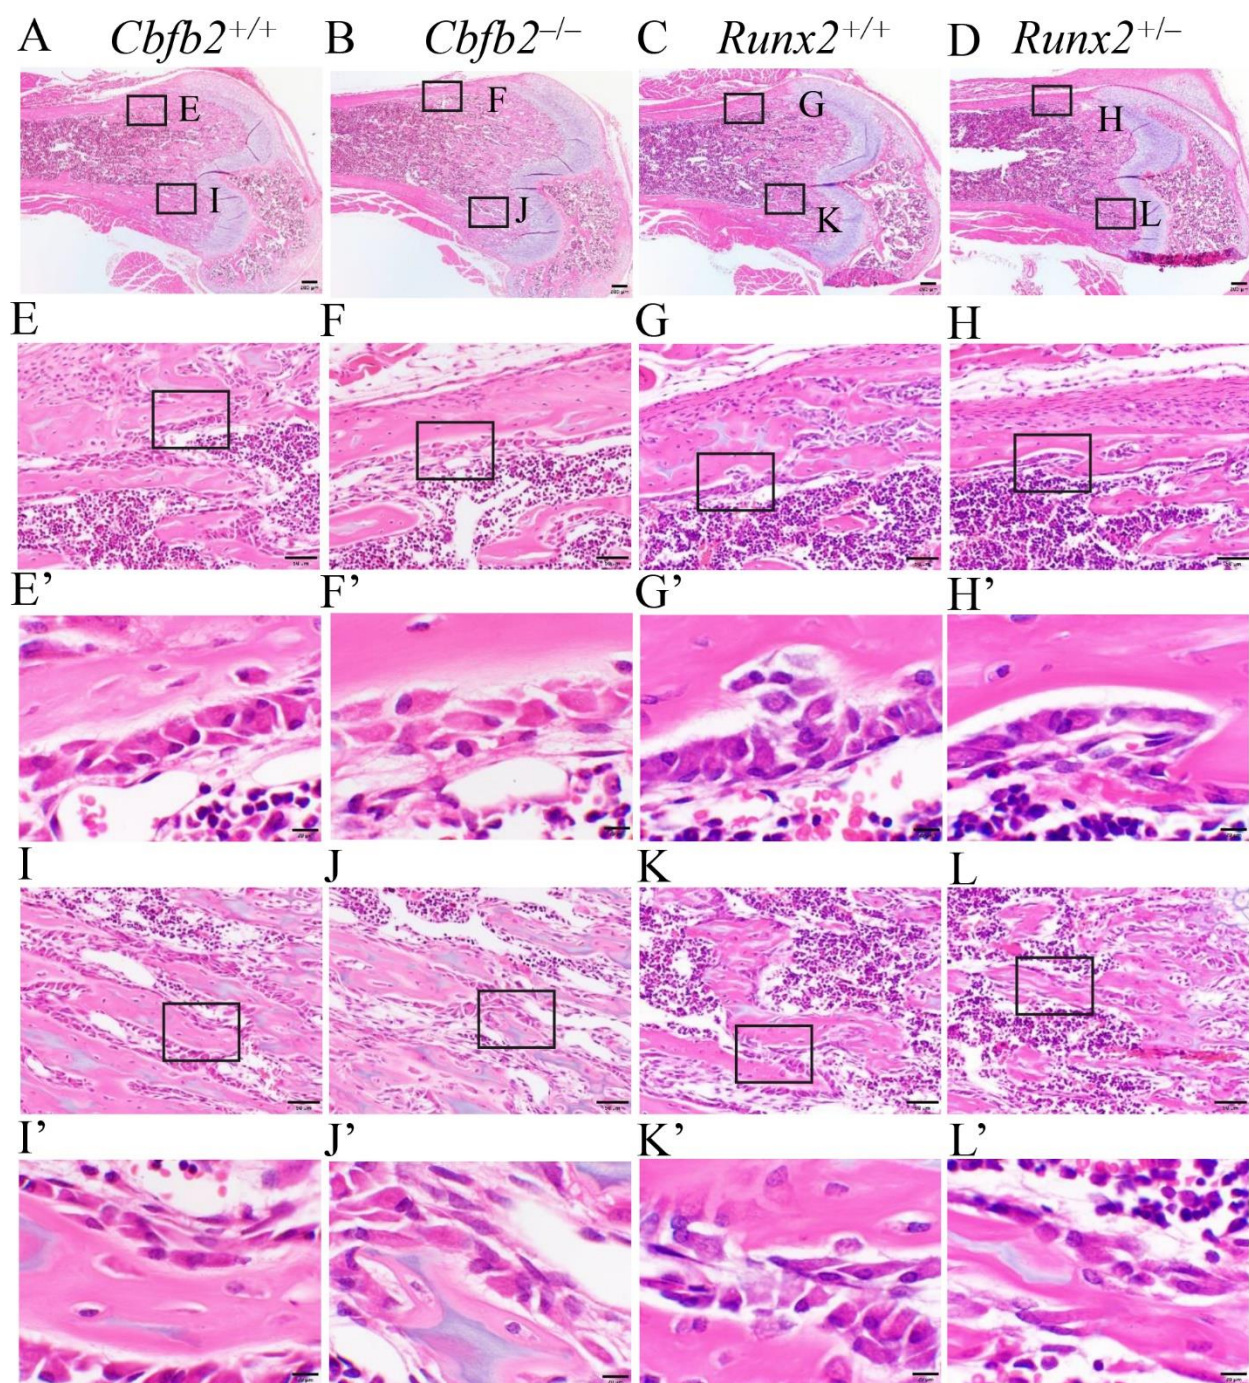

### Supplementary Figure S2.

Histological analyses of femurs at 4 weeks of age. H-E staining of femoral sections in *Cbfb2*<sup>+/+</sup> (A, E, I), *Cbfb2*<sup>-/-</sup> (B, F, J), *Runx2*<sup>+/+</sup> (C, G, K) and *Runx2*<sup>+/-</sup> (D, H, L) mice at 4 weeks of age. The boxed regions in A–D are magnified in E and I, F and J, G and K, and H and L, respectively. The boxed regions in E–L are magnified in E'–L', respectively. Scale bars: 200 μm (A–D), 50 μm (E–L), and 20 μm (E'–L'). The number of mice analyzed: *Cbfb2*<sup>+/+</sup>, n = 3; *Cbfb2*<sup>-/-</sup>, n = 3; *Runx2*<sup>+/+</sup>, n = 3; *Runx2*<sup>+/-</sup>, n = 4.

**A**

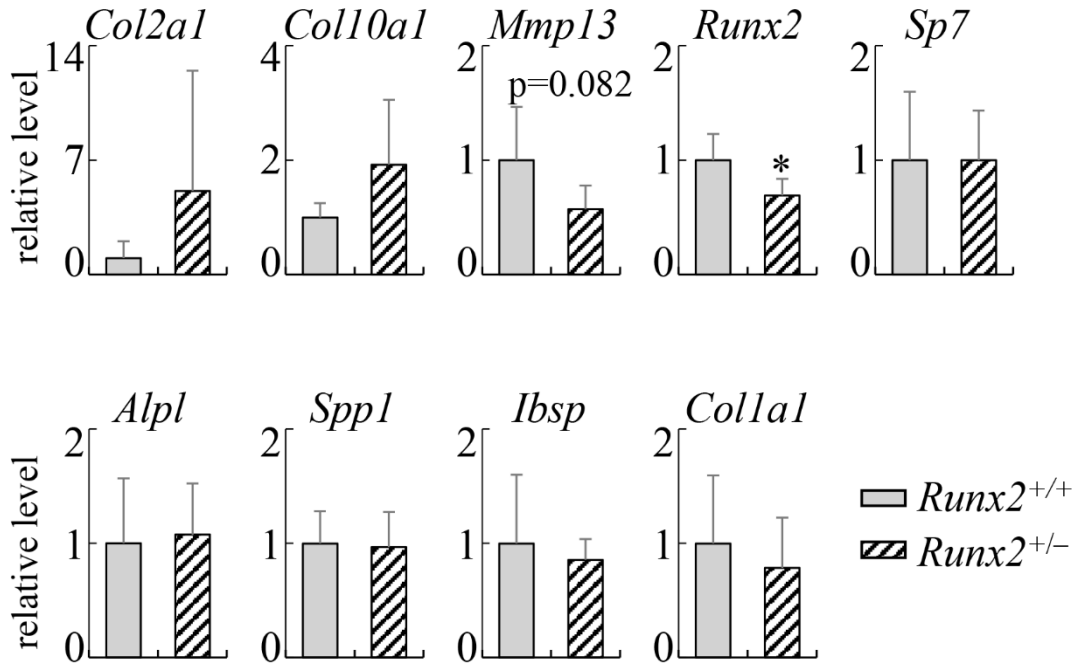

**B**

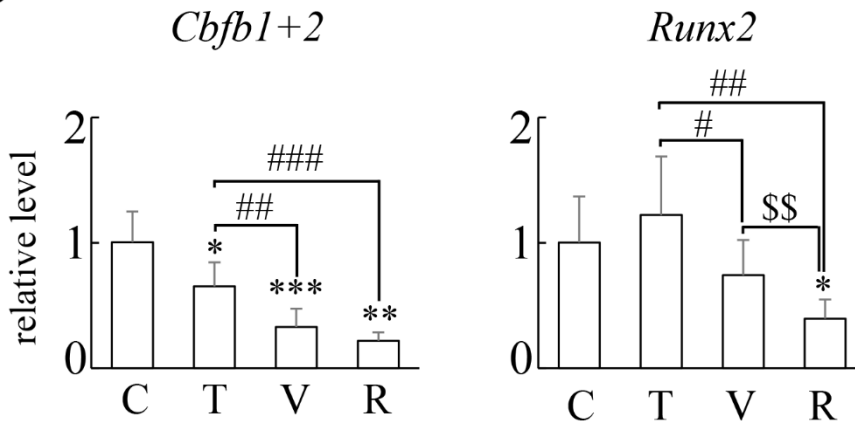

**Supplementary Figure S3.**

(A) Real-time RT-PCR analysis using rib RNA from *Runx2*<sup>+/+</sup> and *Runx2*<sup>+/-</sup> mice at 4 weeks of age. The values of *Runx2*<sup>+/+</sup> mice were defined as 1 and relative levels are shown. The number of mice analyzed: *Runx2*<sup>+/+</sup>, n = 8; *Runx2*<sup>+/-</sup>, n = 7. (B) Real-time RT-PCR analysis using RNA from calvarias (C), tibia (T), vertebrae (V) and ribs (R) from wild type mice at 4 weeks of age. The values of calvarias were defined as 1 and relative levels are shown. The number of mice analyzed: C, n = 4; T, n = 8; V, n = 7; R, n = 8. Data are shown as the mean  $\pm$  SD. \*, #p < 0.05, \*\*, ##, \$\$p < 0.01, and \*\*\*, ###p < 0.001.



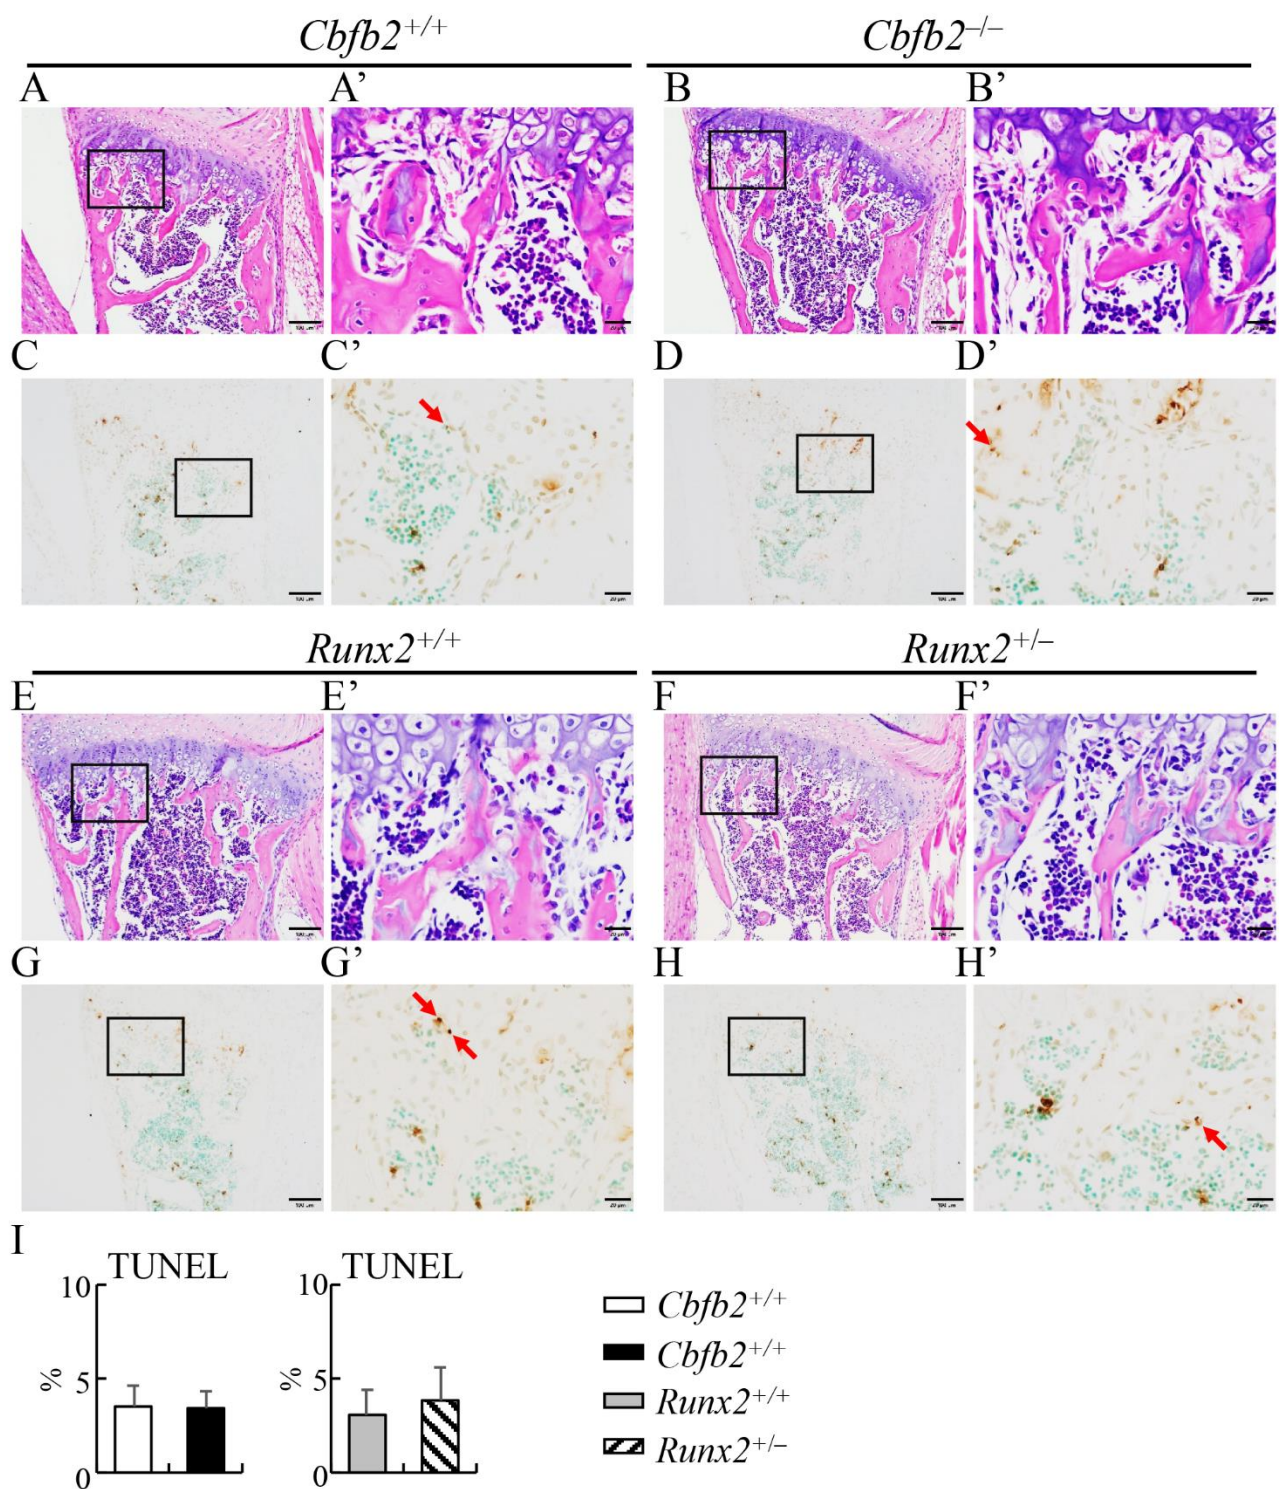

### Supplementary Figure S4.

(A–H) H-E staining (A, B, E, F) and TUNEL staining (C, D, G, H) of the sections of 1st lumbar vertebrae in *Cbfb2*<sup>+/+</sup> (A, C), *Cbfb2*<sup>-/-</sup> (B, D), *Runx2*<sup>+/+</sup> (E, G) and *Runx2*<sup>+/-</sup> (F, H) mice at 4 weeks of age. The boxed regions in A–H are magnified in A'–H', respectively. Scale bars: 100  $\mu$ m (A–H) and 20  $\mu$ m (A'–H'). (I) The frequencies of TUNEL-positive osteoblast-like and osteoprogenitor-like cells shown by arrows were counted in C', D', G' and H'. Data are shown as the mean  $\pm$  SD. The number of mice analyzed: *Cbfb2*<sup>+/+</sup>, n = 3; *Cbfb2*<sup>-/-</sup>, n = 3; *Runx2*<sup>+/+</sup>, n = 3; *Runx2*<sup>+/-</sup>, n = 4. Two regions were counted in each mouse.

| age         | <i>Cbfb2</i> <sup>+/+</sup> number (%) | <i>Cbfb2</i> <sup>+/-</sup> number (%) | <i>Cbfb2</i> <sup>-/-</sup> number (%) |
|-------------|----------------------------------------|----------------------------------------|----------------------------------------|
| E15.5-E18.5 | 148 (25)                               | 297 (51)                               | 137 (24)                               |
| P0-P2       | 114 (27)                               | 215 (52)                               | 87 (21)                                |
| 4w          | 87 (29)                                | 182 (60)                               | 32 (11)                                |

**Supplementary Table S1.**

The numbers and percentages of live *Cbfb2*<sup>+/+</sup>, *Cbfb2*<sup>+/-</sup> and *Cbfb2*<sup>-/-</sup> mice obtained in the crossing of *Cbfb2*<sup>+/-</sup> littermates during the embryonic stage (E15.5-E18.5), newborn stage (P0-P2), and at 4 weeks of age.

## Supplementary Table S2.

Primer sequences for real-time RT-PCR :

|                         | Forward                | Reverse               |
|-------------------------|------------------------|-----------------------|
|                         | 5'-----3'              | 5'-----3'             |
| <i>Actb</i>             | CCACCCGCGAGCACAGCTTC   | TTGTCGACGACCAGCGCAGC  |
| <i>Col2a1</i>           | ATCTGGTTTGGAGAGACCAT   | CTCTACATCATTGGAGCCCT  |
| <i>Col10a1</i>          | ATATGCTGCCTCAAATACCC   | CTCTTATGGCGTATGGGAT   |
| <i>Mmp13</i>            | CTTCTGGCACACGCTTTTCC   | ATGGGAAACATCAGGGGCTCC |
| <i>Runx2</i>            | AACAAGACCCTGCCCCGTG    | TGAAACTCTTGCCTCGTCCG  |
| <i>Sp7</i>              | AGGCACAAAGAAGCCATAC    | AATGAGTGAGGGAAGGGT    |
| <i>Alpl</i>             | CGCACGCGATGCAACACCAC   | TGCCCACGGACTTCCCAGCA  |
| <i>Spp1</i>             | GCAGAATCTCCTTGCGCCAC   | CGAGTCCACAGAATCCTCGC  |
| <i>Ibsp</i>             | TGGAGACGGCGATAGTTC     | CTAGCTGTTACACCCGAGAG  |
| <i>Col1a1</i>           | CCTGGAATGAAGGGACACCG   | CCATCGTTACCGCGAGCACC  |
| <i>Bglap&amp;Bglap2</i> | ACTCCGGCGCTACCTTGAGGCC | GCAGGGTTAAGCTCACACTG  |
| <i>Runx1</i>            | CGGCCATGAAGAACCAGGTA   | TGGTAGGTGGCAACTTGTGG  |
| <i>Runx3</i>            | AACCAAGTGGCCAGGTTCAA   | TGATGGCTCGGTGGTAGGTA  |
| <i>Cbfb1</i>            | GCTCCCATGATTCTGAATGG   | TTGCTGTCTTCTTGCCTCCA  |
| <i>Cbfb2</i>            | ATCTCCACAGATTGGATGGT   | TGCTGTCTTCTTGCCAGTTA  |
| <i>Cbfb1+2</i>          | TTAGAGAGAGAAGCAGGCAA   | TCTTCTTCGAGCCTCTTCAA  |
| <i>Runx2(Sup)</i>       | TCCACCACGCCGCTGTCT     | TCAGTGAGGGATGAAATGCT  |
